# Supplementary material
Source: PubMed Central journal article supplement (PMC3920732)
Supplement: NIHMS547584-supplement-01.pdf [file NIHMS547584-supplement-01.pdf]

## SUPPLEMENTARY ONLINE DATA

# Complex between $\alpha$ -bungarotoxin and an $\alpha 7$ nicotinic receptor ligand-binding domain chimaera

Sun HUANG\*<sup>1</sup>, Shu-Xing LI†<sup>1</sup>, Nina BREN\*<sup>1</sup>, Kevin CHENG†, Ryan GOMOTO†, Lin CHEN†‡<sup>2,3</sup> and Steven M. SINE\*§<sup>2,3</sup>

\*Department of Physiology and Biomedical Engineering, Mayo Clinic College of Medicine, 200 First St. SW, Rochester, MN 55902, U.S.A., †Molecular and Computational Biology, Departments of Biological Sciences and Chemistry, University of Southern California, 1050 Childs Way, Los Angeles, CA 90089-2910, U.S.A., ‡Norris Comprehensive Cancer Center, Keck School of Medicine, University of Southern California, Los Angeles, CA 90033, U.S.A., and §Department of Neurology, Mayo Clinic College of Medicine, 200 First St. SW, Rochester, MN 55902, U.S.A.

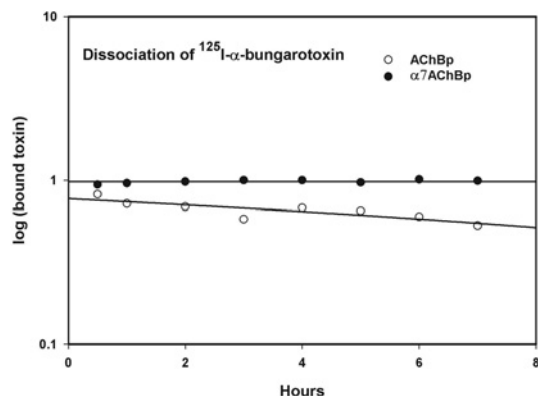

**Figure S1** Dissociation of <sup>125</sup>I-labelled  $\alpha$ -btX from the  $\alpha 7$ /AChBP chimaera and AChBP

Dissociation of <sup>125</sup>I-labelled  $\alpha$ -btX bound to either the  $\alpha 7$ /AChBP chimaera or AChBP bound to an anti-FLAG M2 agarose affinity gel as described in the Experimental section of the main text.

**Table S1** Inter-residue contacts between  $\alpha$ -btX and the  $\alpha 7$ /AChBP chimaera

Inter-residue contacts were calculated using CNS with a 4.5 Å distance cut-off.

(a) Interacting residue pairs between  $\alpha$ -btX and the  $\alpha 7$ /AChBP chimaera principal subunit

| $\alpha 7$ /AChBP principal subunit | $\alpha$ -btX     |
|-------------------------------------|-------------------|
| Tyr <sup>91</sup>                   | Phe <sup>32</sup> |
| Tyr <sup>91</sup>                   | Arg <sup>36</sup> |
| Trp <sup>145</sup>                  | Phe <sup>32</sup> |
| Arg <sup>150</sup>                  | Ser <sup>9</sup>  |
| Arg <sup>150</sup>                  | Pro <sup>10</sup> |
| Glu <sup>181</sup>                  | Ser <sup>9</sup>  |
| Arg <sup>182</sup>                  | Asp <sup>30</sup> |
| Arg <sup>182</sup>                  | Val <sup>39</sup> |
| Phe <sup>183</sup>                  | Thr <sup>6</sup>  |
| Phe <sup>183</sup>                  | Ser <sup>9</sup>  |
| Phe <sup>183</sup>                  | Ile <sup>11</sup> |
| Phe <sup>183</sup>                  | Val <sup>40</sup> |
| Tyr <sup>184</sup>                  | Asp <sup>30</sup> |
| Tyr <sup>184</sup>                  | Phe <sup>32</sup> |
| Tyr <sup>184</sup>                  | Arg <sup>36</sup> |
| Tyr <sup>184</sup>                  | Val <sup>39</sup> |
| Glu <sup>185</sup>                  | Met <sup>27</sup> |
| Glu <sup>185</sup>                  | Lys <sup>38</sup> |
| Glu <sup>185</sup>                  | Val <sup>40</sup> |
| Glu <sup>185</sup>                  | Pro <sup>69</sup> |
| Cys <sup>186</sup>                  | Lys <sup>70</sup> |
| Lys <sup>188</sup>                  | Ile <sup>11</sup> |
| Lys <sup>188</sup>                  | His <sup>68</sup> |
| Lys <sup>188</sup>                  | Lys <sup>70</sup> |
| Lys <sup>188</sup>                  | Gln <sup>71</sup> |
| Pro <sup>190</sup>                  | Ser <sup>9</sup>  |
| Tyr <sup>191</sup>                  | Arg <sup>36</sup> |

(b) Interacting residue pairs between  $\alpha$ -btX and the  $\alpha 7$ /AChBP chimaera complementary subunit

| $\alpha 7$ /AChBP complementary subunit | $\alpha$ -btX     |
|-----------------------------------------|-------------------|
| Ser <sup>32</sup>                       | Ser <sup>34</sup> |
| Ser <sup>34</sup>                       | Ser <sup>34</sup> |
| Leu <sup>36</sup>                       | Val <sup>31</sup> |
| Trp <sup>53</sup>                       | Val <sup>31</sup> |
| Trp <sup>53</sup>                       | Phe <sup>32</sup> |
| Gln <sup>55</sup>                       | Ser <sup>35</sup> |
| Gln <sup>114</sup>                      | Ser <sup>35</sup> |
| Leu <sup>116</sup>                      | Ser <sup>34</sup> |
| Leu <sup>116</sup>                      | Ser <sup>35</sup> |
| Asp <sup>160</sup>                      | Cys <sup>29</sup> |
| Asp <sup>160</sup>                      | Ser <sup>34</sup> |

<sup>1</sup> These authors contributed equally to this work.

<sup>2</sup> These authors are co-senior authors.

<sup>3</sup> Correspondence may be addressed to either of these authors (email linchen@usc.edu or sine@mayo.edu).

The structural co-ordinates reported will appear in the PDB under accession code 4HQF.

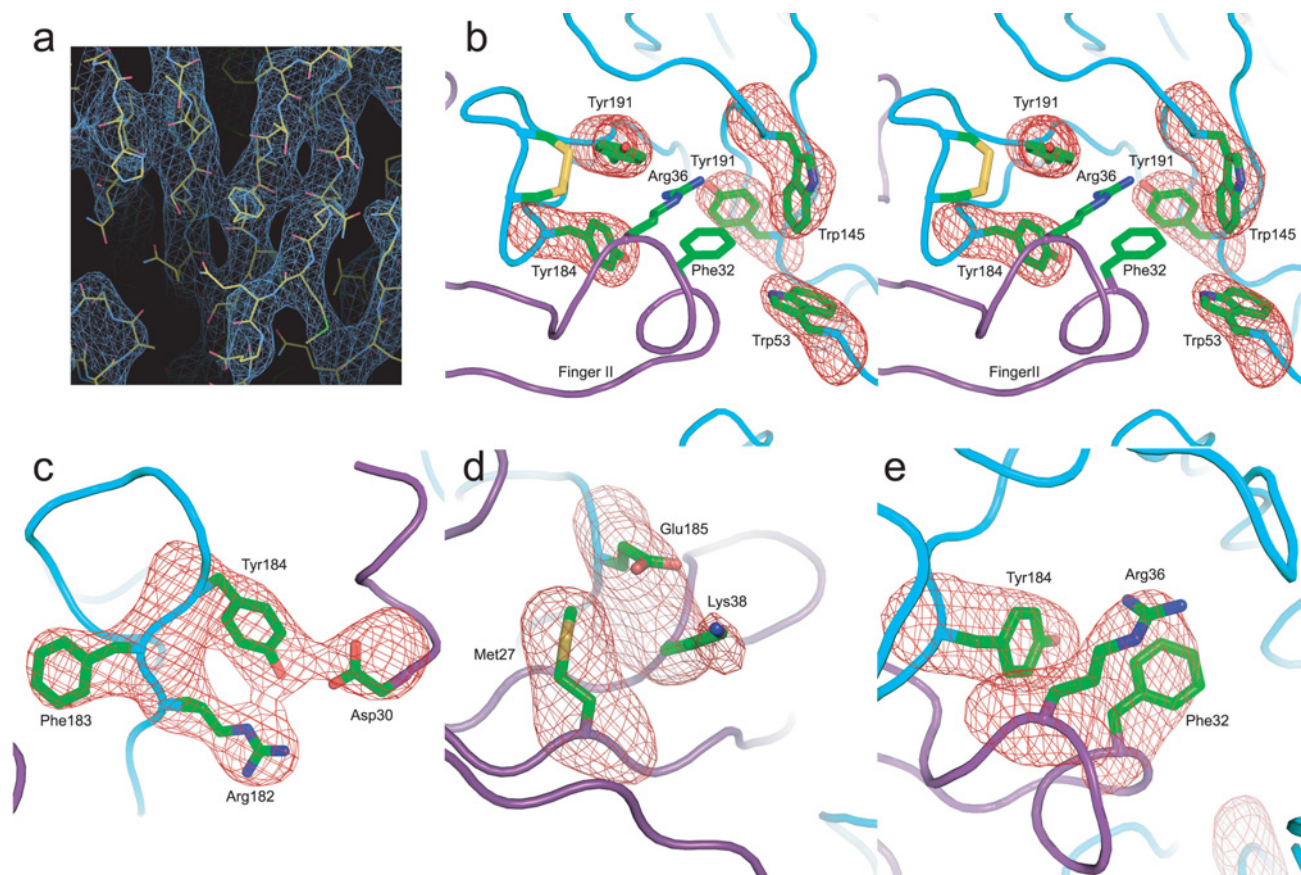

**Figure S2** Representative regions of the  $\alpha 7$ /AChBP chimaera- $\alpha$ -btx structure showing well-defined electron density

(a) Part of the  $2F_o - F_c$  electron density map. (b) Stereo view of the simulated annealing omit map calculated for the ligand-binding site residues contoured at the  $4.0 \sigma$  level. (c) Simulated annealing omit map calculated for Arg<sup>182</sup>, Phe<sup>183</sup> and Tyr<sup>184</sup> from the  $\alpha 7$ /AChBP chimaera and Asp<sup>30</sup> from  $\alpha$ -btx contoured at the  $4.0 \sigma$  level. (d) Simulated annealing omit map calculated for Glu<sup>185</sup> from the  $\alpha 7$ /AChBP chimaera and Met<sup>27</sup> and Lys<sup>38</sup> from  $\alpha$ -btx contoured at the  $4.0 \sigma$  level. (e) Simulated annealing omit map calculated for Tyr<sup>184</sup> from the  $\alpha 7$ /AChBP chimaera and Phe<sup>32</sup> and Arg<sup>36</sup> from  $\alpha$ -btx contoured at the  $4.0 \sigma$  level.

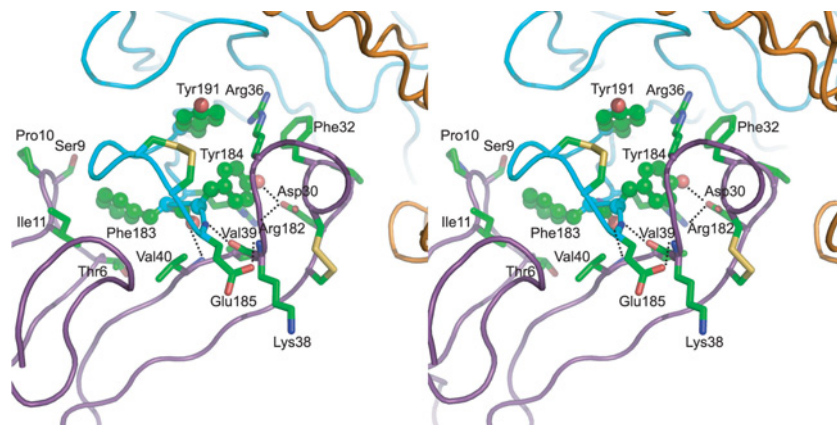

**Figure S3** Stereo view of the interaction network surrounding loop C (cyan)

$\alpha$ -btx is in purple, the principal subunit in cyan and the complementary subunit in orange. Residues Phe<sup>183</sup>, Tyr<sup>184</sup> and Tyr<sup>191</sup> are shown as spheres, and hydrogen bonds as dotted lines.
